# Supplementary material
Source: publisher figshare collection journal article supplement (https://acs.figshare.com/ndownloader/files/3818938)
Supplement: Supplementary file 1 [file 3818938]

## Supporting Information

for

### Formation and Spectroscopy of Dicyanotriacetylene (NC<sub>8</sub>N) in Solid Kr

Michał Turowski<sup>a\*</sup>, Claudine Crépin<sup>b</sup>, Stéphane Douin<sup>b</sup>, and Robert Kołos<sup>a</sup>

<sup>a</sup> *Institute of Physical Chemistry of the Polish Academy of Sciences, Kasprzaka 44/52, 01-224 Warsaw, Poland*

<sup>b</sup> *Institut des Sciences Moléculaires d'Orsay, UMR 8214 CNRS, Université de Paris-Sud, 91405 Orsay, France*

\* Corresponding author, email address: mturowski@ichf.edu.pl

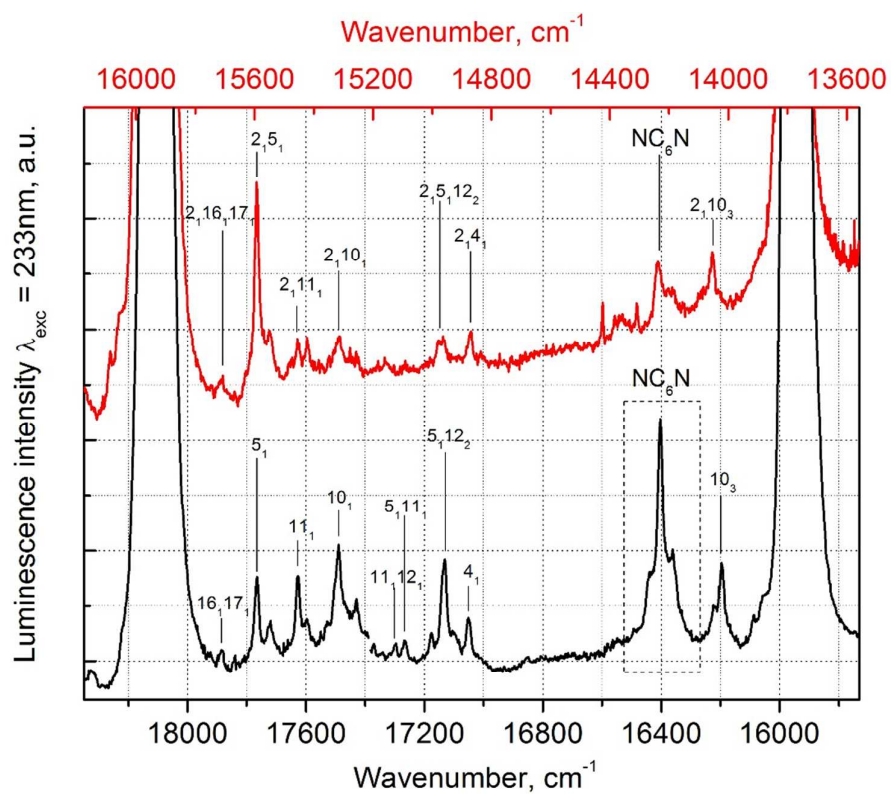

**Fig. S1.** Two adjacent spectral regions of NC<sub>8</sub>N phosphorescence in solid krypton (resultant from a mixture of HC<sub>3</sub><sup>14</sup>N and HC<sub>3</sub><sup>15</sup>N precursors), shifted along the wavenumber axis to line up the bands differing only by the excitation of the  $\nu_2$  mode.

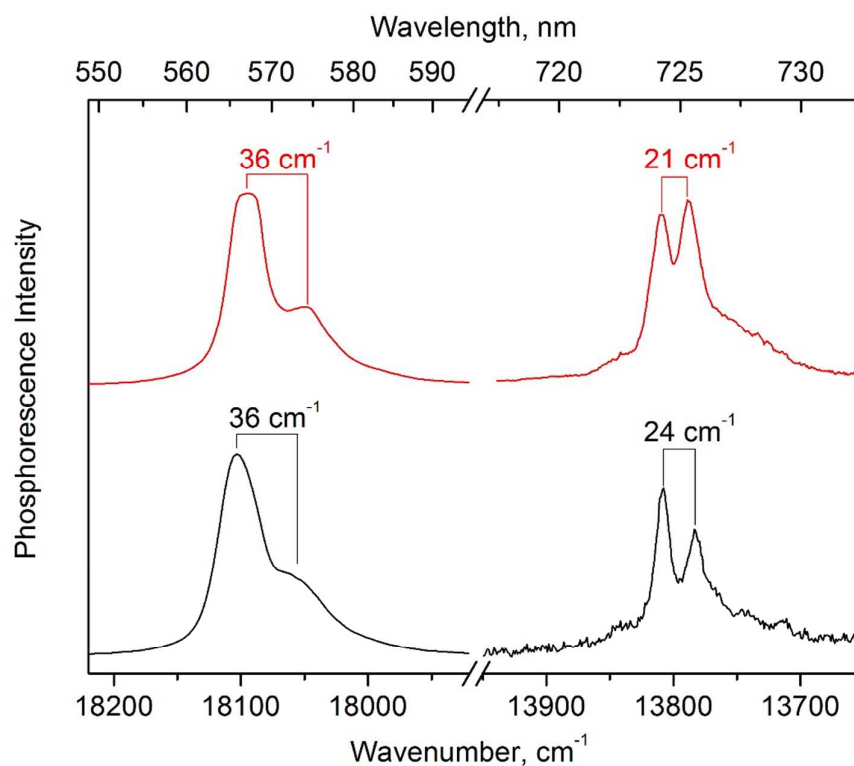

**Fig. S2.** Selected fragments of  $\text{NC}_8\text{N}$  phosphorescence generated in solid krypton, from a 1:1  $\text{HC}_3^{14}\text{N}:\text{HC}_3^{15}\text{N}$  mixture of precursors (upper trace, in red) and from  $\text{HC}_3^{14}\text{N}$  alone (bottom trace), showing (left) the  $0-0$  band structure due to unequal matrix trapping sites, and (right) the possible  $2_2^0/4_4^0$  Fermi resonance pair. Spectra recorded for thermally annealed samples.
